# Supplementary material for: Ultrathin SU-8 membrane for highly efficient tunable cell patterning and massively parallel large biomolecular delivery
Source: Royal Society of Chemistry journal article supplement (doi:10.1039/d3lc00244f), 2023-01-01
Supplement: d3lc00244f1.pdf [file d3lc00244f1.pdf]

## SUPPLEMENTARY INFORMATION

### Ultrathin SU-8 Membrane for Highly Efficient Tunable Cell Patterning and Massively Parallel Large Biomolecular Delivery

Pallavi Shinde<sup>1#</sup>, Ashwini Shinde<sup>1#</sup>, Srabani Kar<sup>2</sup>, Kavitha Illath<sup>1</sup>, Moeto Nagai<sup>3</sup>, Fan-Gang Tseng<sup>4</sup>, and Tuhin Subhra Santra<sup>1\*</sup>

<sup>1</sup>Department of Engineering Design, Indian Institute of Technology Madras, Chennai, India.

<sup>2</sup>Department of Electrical Engineering, University of Cambridge, UK.

<sup>3</sup>Department of Mechanical Engineering, Toyohashi University of Technology, Japan.

<sup>4</sup>Department of Engineering and System Science, National Tsing Hua University, Taiwan.

# Authors Contributed Equally; \*Corresponding Author: [tuhin@iitm.ac.in](mailto:tuhin@iitm.ac.in),  
[santra.tuhin@gmail.com](mailto:santra.tuhin@gmail.com)

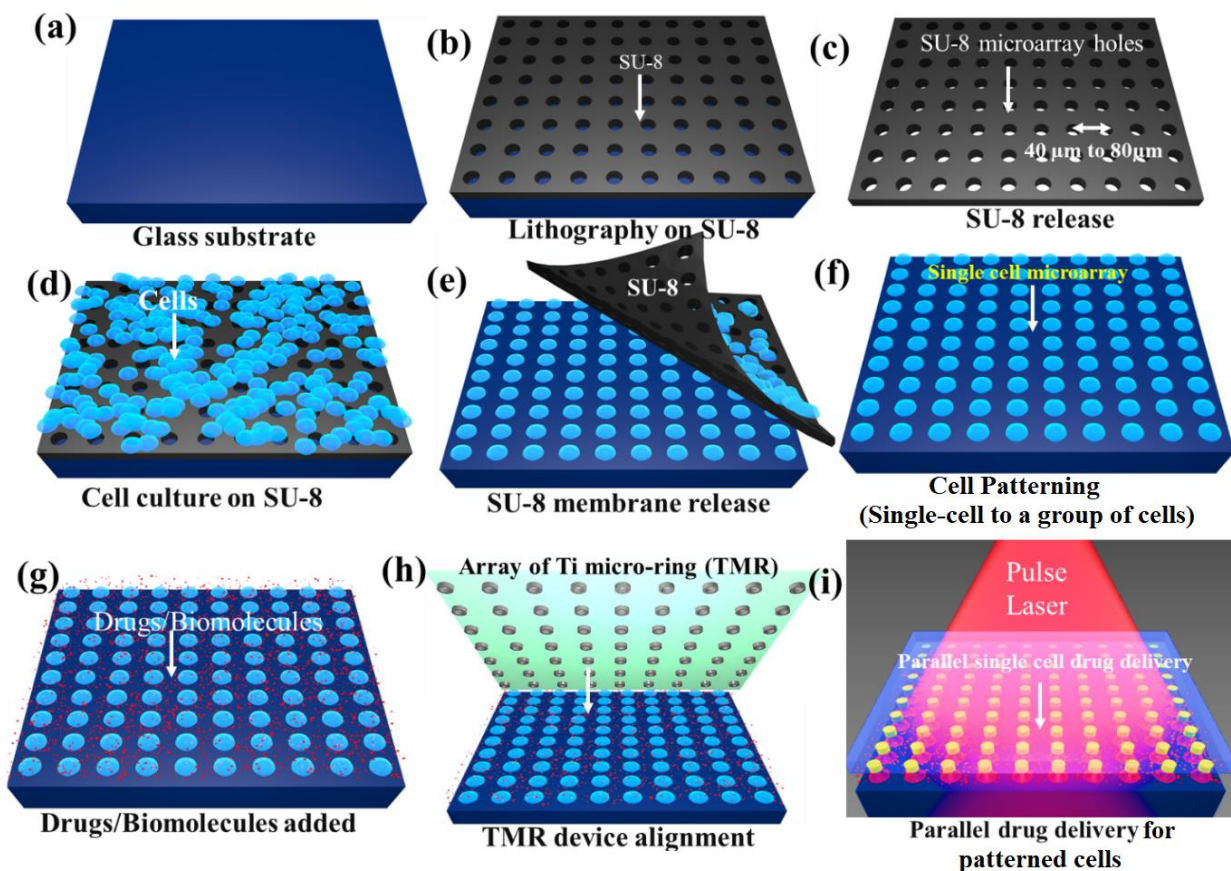

**Figure S1.** Schematic representation of the use of SU-8 membrane micro stencil for cell patterning and massively parallel intracellular delivery using TMR-assisted photoporation technique. (a) Clean glass substrate; (b) Fabrication of SU-8 membrane on a glass substrate; (c) Release of standalone SU-8 membrane from the glass substrate; (d) Cell culture on top of SU-8 membrane laid on the petri dish; (e) Peeling off of the SU-8 membrane after 24 hours of

cell seeding; (f) Obtain an array of cell pattern (single-cell to a group of cells) on the petri dish; (g) Addition of biomolecules for intracellular delivery; (h) The alignment of TMR device across the cell pattern; (i) Exposure of an IR pulse laser, creating transient membrane pores to deliver biomolecules into patterned cells.

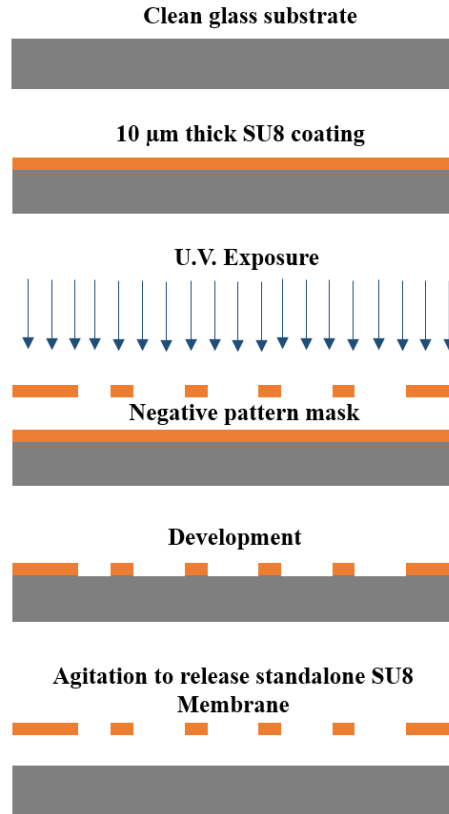

**Figure S2.** Schematic representation of the step-by-step procedure to fabricate ultrathin SU-8 standalone micro stencil membrane.

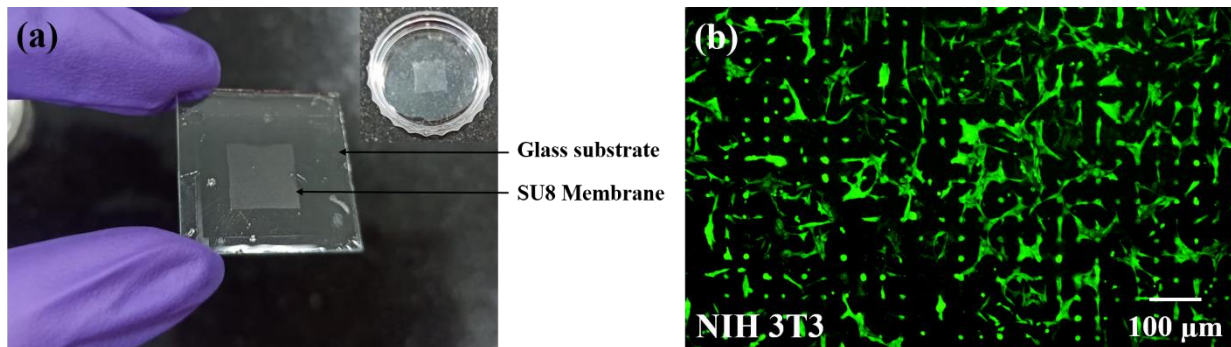

**Figure S3.** (a) Picture of fabricated standalone SU8 membrane placed on the substrate across a patterning area; (b) Microscopic bright-field image of the NIH3T3 cells seeded on top of SU-8 membrane confirming its biocompatibility.



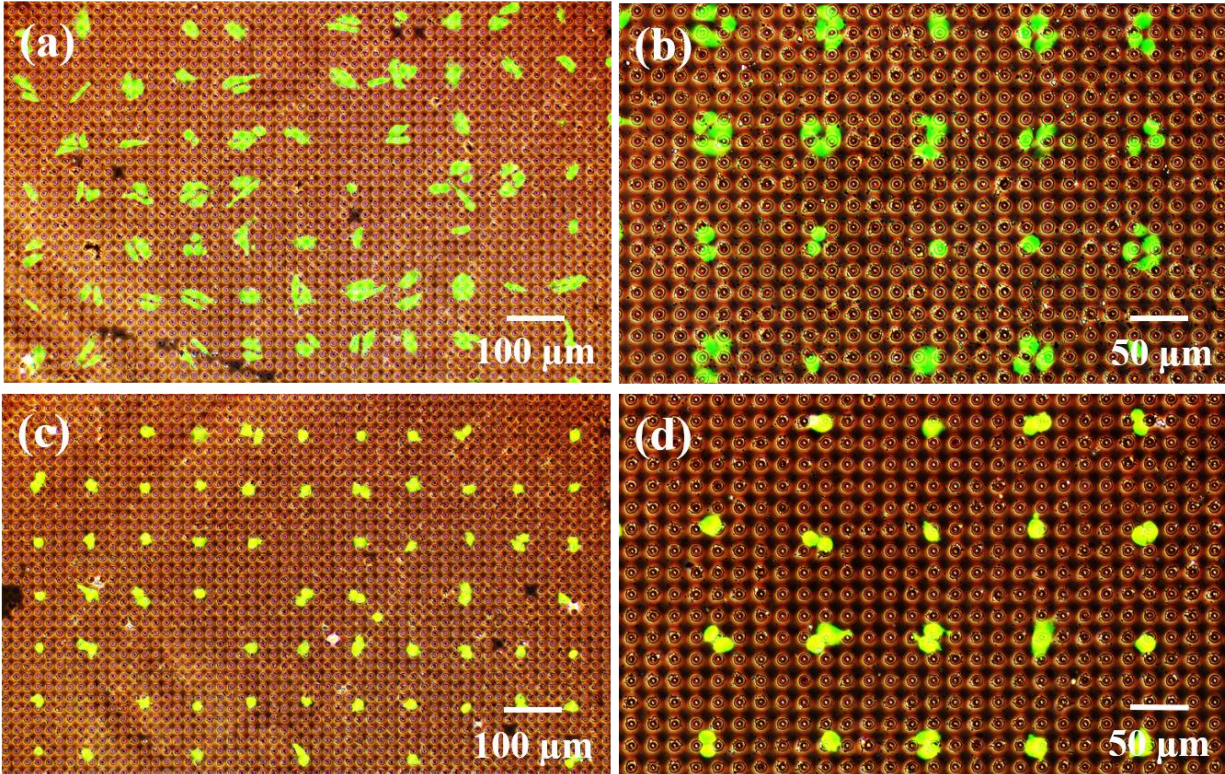

*Figure S4. Alignment of TMR device over the patterned cells – (a, b) SiHa cells; (c, d) L929 cells.*

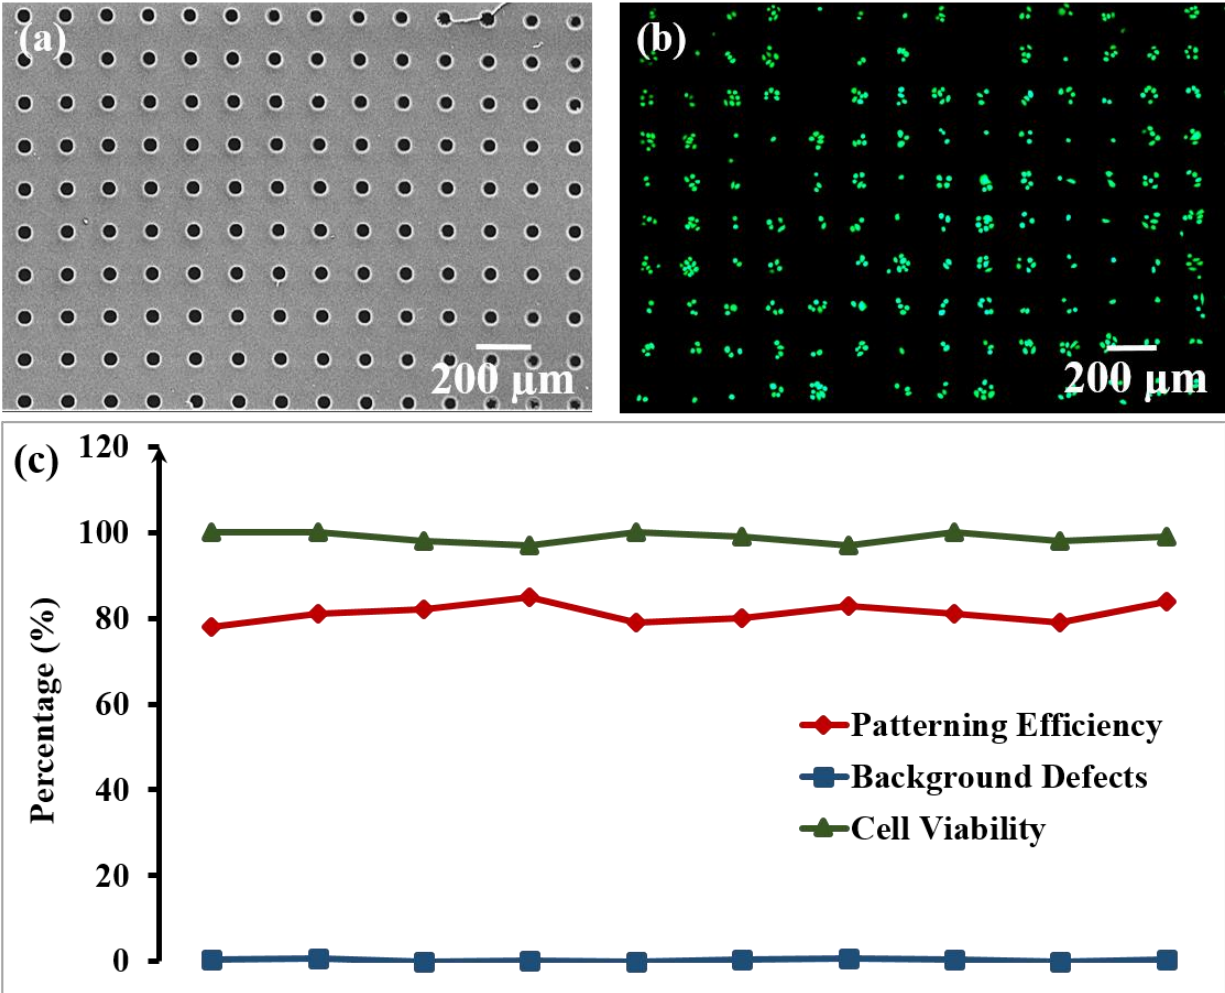

*Figure S5. SiHa cells patterning efficiency - (a) SEM image of the final 3D SU-8 standalone membrane kept on a glass substrate showing an array of through-holes. (b) A representative fluorescent microscopic image of SiHa cells stained by Calcein AM after lift-off of SU-8 membrane. (c) Recorded data from 10 randomly selected locations of the SU8 membrane after lift-off to estimate the patterning performance.*

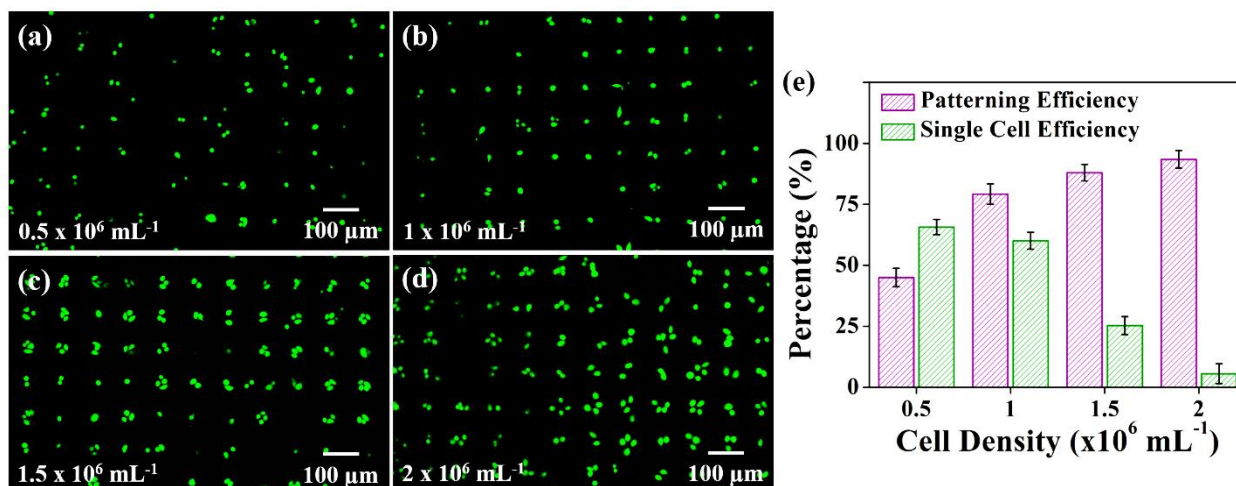

Figure S6. Fluorescent images showing SU-8 membrane-assisted patterning of L929 cells seeded with varying concentration – (a)  $0.5 \times 10^6 \text{ mL}^{-1}$ ; (b)  $1 \times 10^6 \text{ mL}^{-1}$ ; (c)  $1.5 \times 10^6 \text{ mL}^{-1}$ ; (d)  $2 \times 10^6 \text{ mL}^{-1}$ . (e) Graph of cell patterning efficiency and single-cell efficiency using 45  $\mu\text{m}$  SU-8 membrane for L929 cells at various cell seeding concentrations ( $n=3$  replicate).

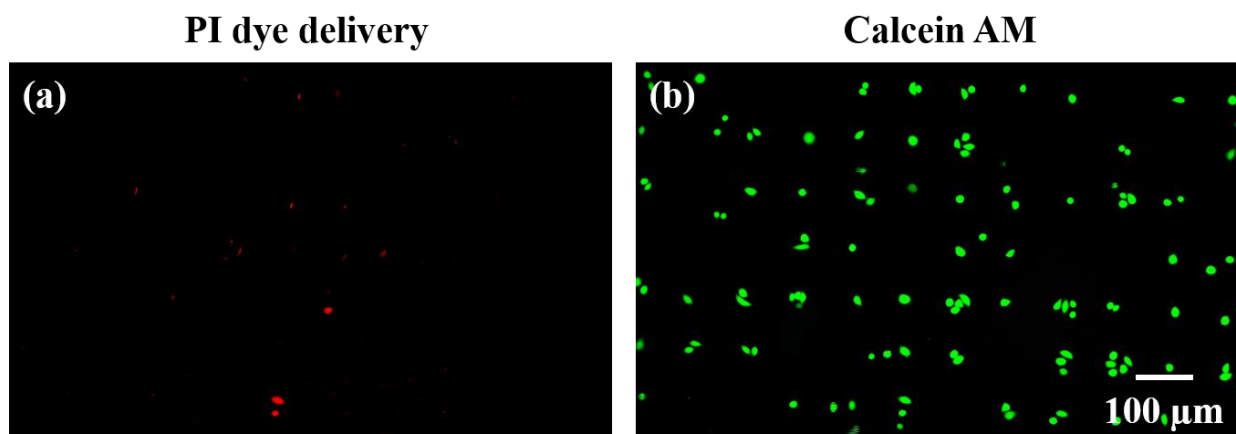

Figure S7. Fluorescent images for SU-8 membrane patterned SiHa cells after the TMR-assisted photoporation (without any media between patterned cells and TMR device) – (a) PI dye delivery; (b) Calcein AM stained.

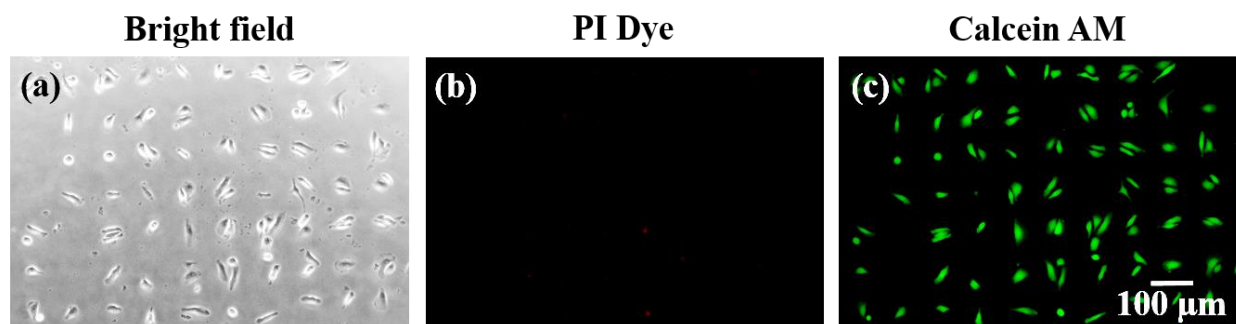



**Figure S8.** Control experiment on SU-8 membrane-assisted patterned SiHa cells using TMR platform. (a) bright-field image; (b) PI dye staining on the nucleus of dead cells (No laser exposure); (c) cell viability test using calcein-AM confirmed that all cells are live (green color).

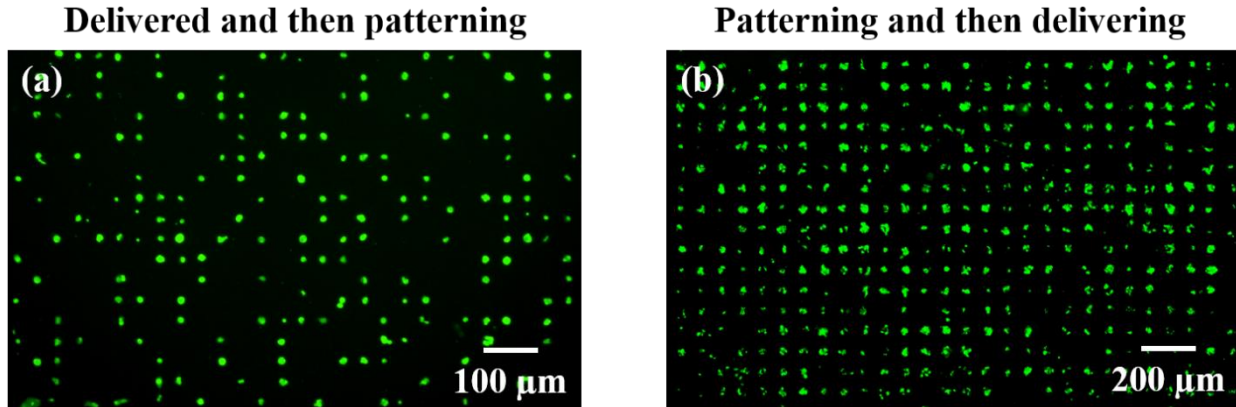

**Figure S9.** (a) L929 cells (Calcein AM stained) were first delivered with PI dye (668 Da) biomolecule and then patterned using SU-8 membrane 45  $\mu\text{m}$  hole with patterning efficiency  $\sim 30\%$ . (b) L929 cells (Calcein AM stained) were first patterned with an efficiency of  $\sim 81\%$  and then delivered with the dextran biomolecule.

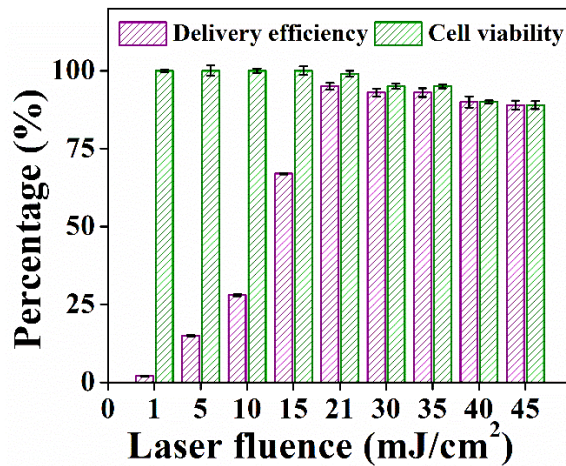

**Figure S10.** Quantification of PI dye delivery in SiHa cells at various laser fluence ( $n=3$  replicate, data presented as mean  $\pm$  S.D.).

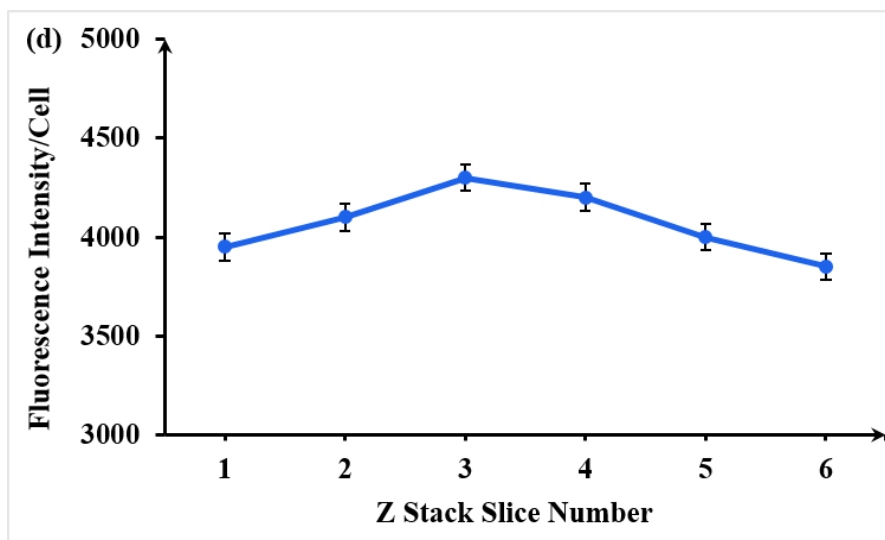

*Figure S11. Quantifying fluorescence intensity of merged images on a per-cell basis indicates uniform delivery and cell viability (n=3 replicate, data presented as mean ± S.D).*

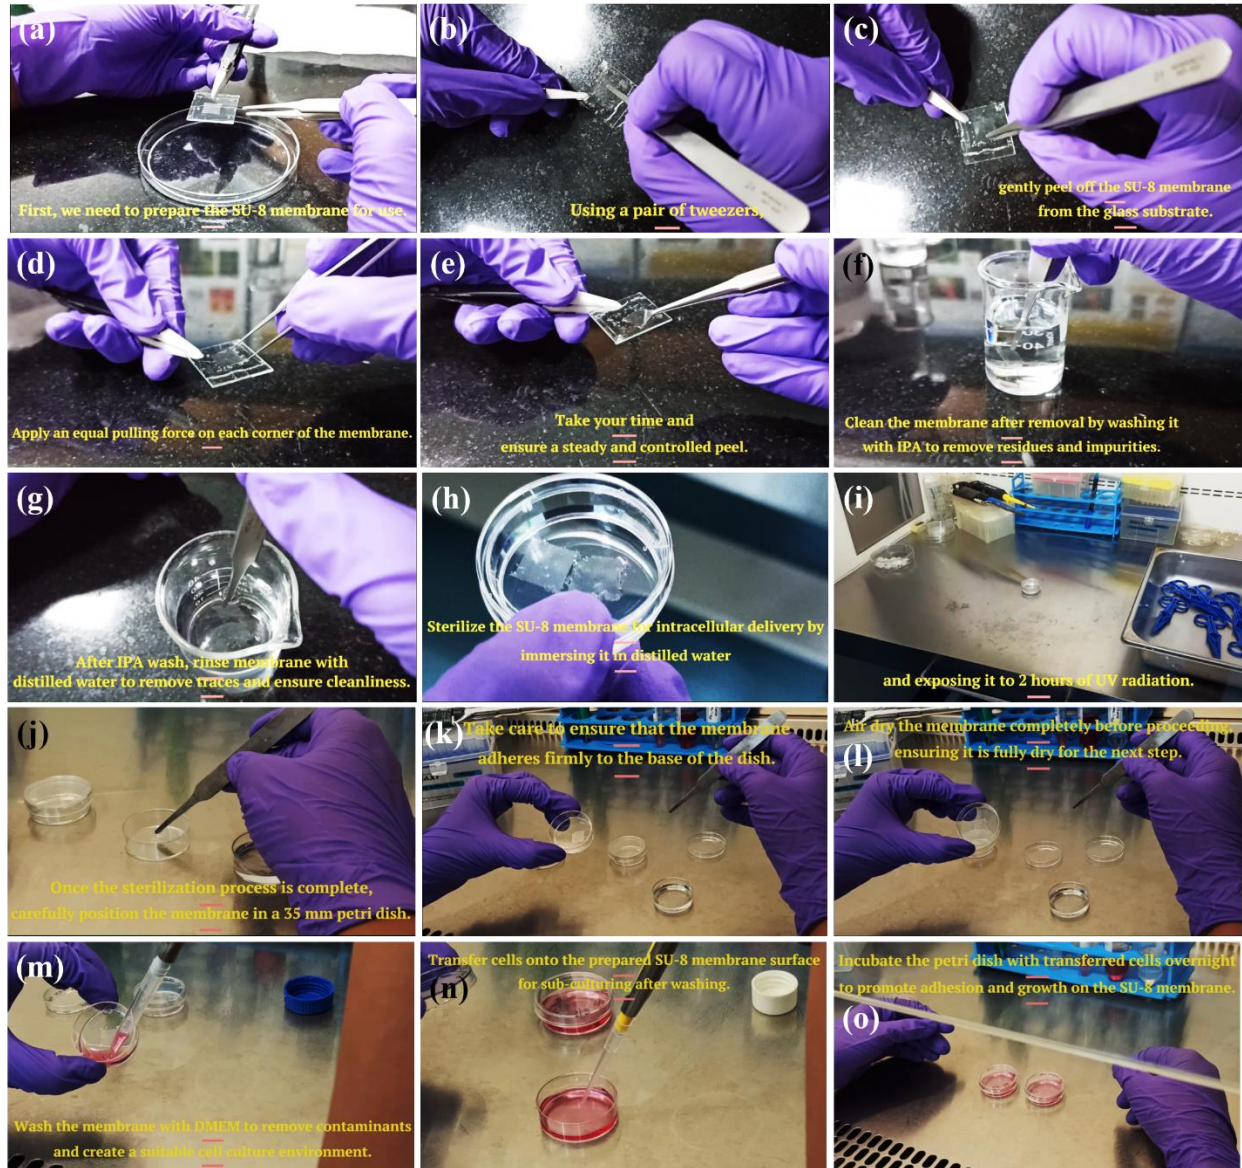

**Figure S12. Step-by-step guide: Transferring a SU-8 membrane from a glass substrate to a cell culture dish.**
